# Supplementary material
Source: publisher figshare collection journal article supplement (https://future-science-group.figshare.com/ndownloader/files/28220373)
Supplement: Supplementary file 1 [file 28220373]

**Supplemental Materials**

**Supplemental Material 02: Interview discussion questions**

# KOL Interview Discussion Guide

# Introduction

Thank you for the participation in this strategic discussion. We are developing a position paper to provide education on RWE trends, challenges, and success stories to enhance the generation and dissemination of RWE.

Today’s conversation will focus on your perspective using RWE. The insights you provide will help refine and shape the position paper.

1. Discussion Questions
2. What is the impact of RWE on your treatment decisions (e.g., how does RWE impact your day-to-day decision making)?
3. We are looking for past success stories utilizing RWE. Can you provide additional detail on how this RWE study can be considered a success story for others to emulate (e.g., did the study change treatment options? Did it change paradigm related to QoL)?
4. What is your perspective on the acceptability of RWE generated from other countries in your region (i.e., which end points specifically would you accept)?
5. What factors do you consider when evaluating the credibility of real-world data and real-world evidence that will be used for making treatment decisions?
6. What is your perspective on RWE guidance issued by regulatory bodies from other parts of the world (e.g., China, US, EU) when considering use of RWE in your market?
7. Are there any other topics or challenges you feel that are important, which we have not discussed?
